# Supplementary material for: A coumarin Schiff base and its Ag(i) and Cu(ii) complexes: synthesis, characterization, DFT calculations and biological applications
Source: Royal Society of Chemistry journal article supplement (doi:10.1039/d0nj05688j), 2021-01-01
Supplement: d0nj05688j10.pdf [file d0nj05688j10.pdf]

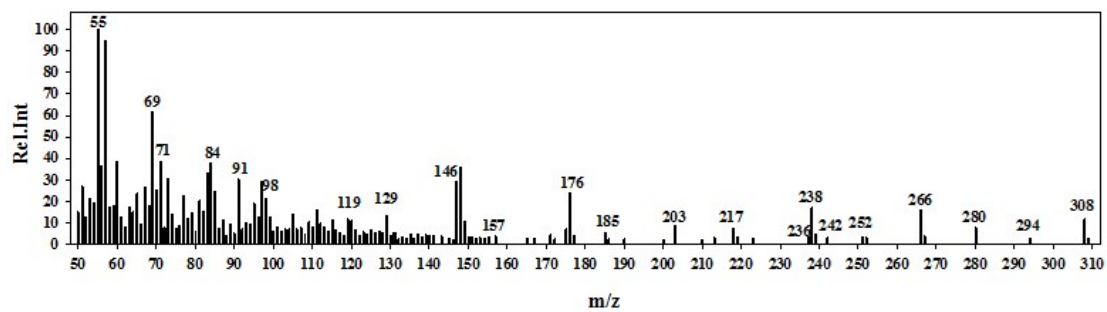

**Fig. S1** Mass spectrum of Sbat

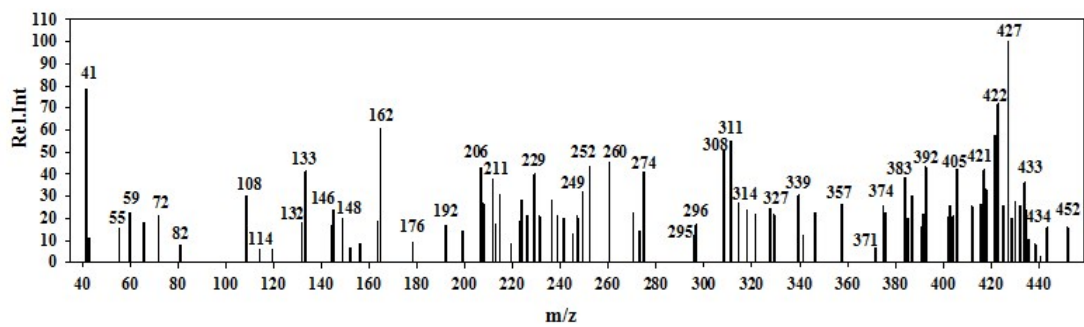

**Fig. S2 Mass spectrum of Ag-Sbat**

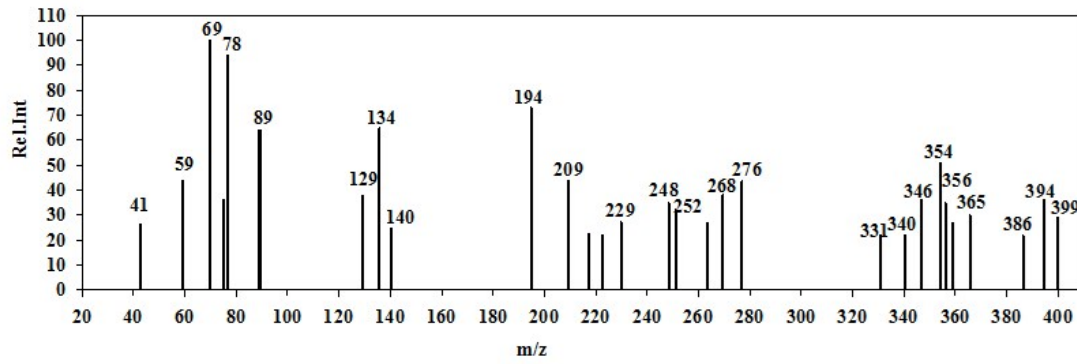

**Fig. S3** Mass spectrum of Cu-Sbat

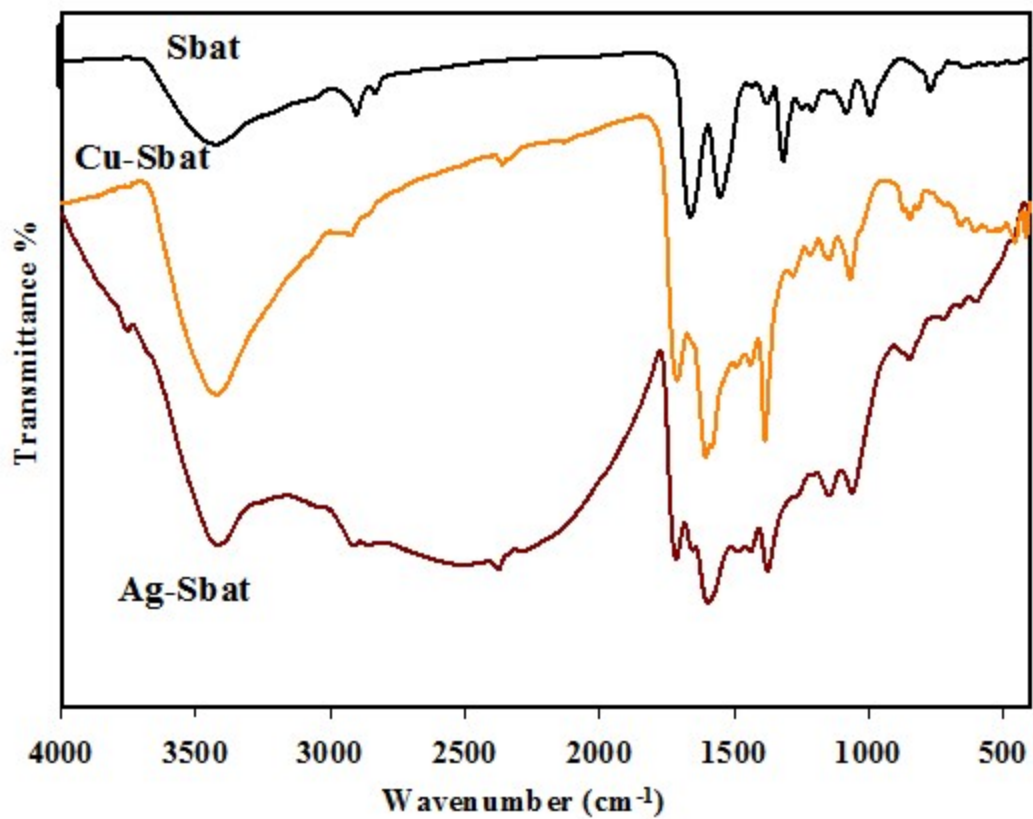

Fig. S4 IR spectra of the Schiff base and its complexes

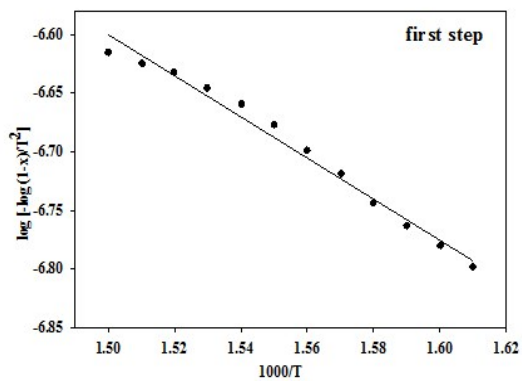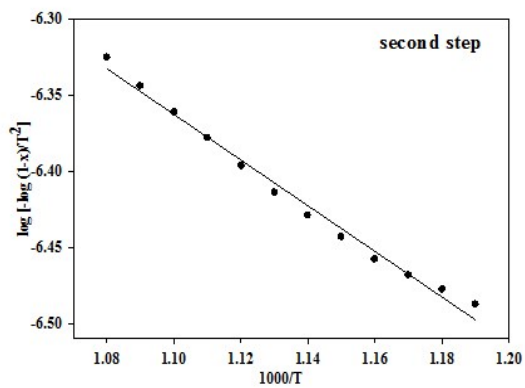

**Fig. S5** A plot of  $\log (-\log (1-x) / T^2)$  vs.  $1000 / T$  of silver complex based on Coats-Redfern equation

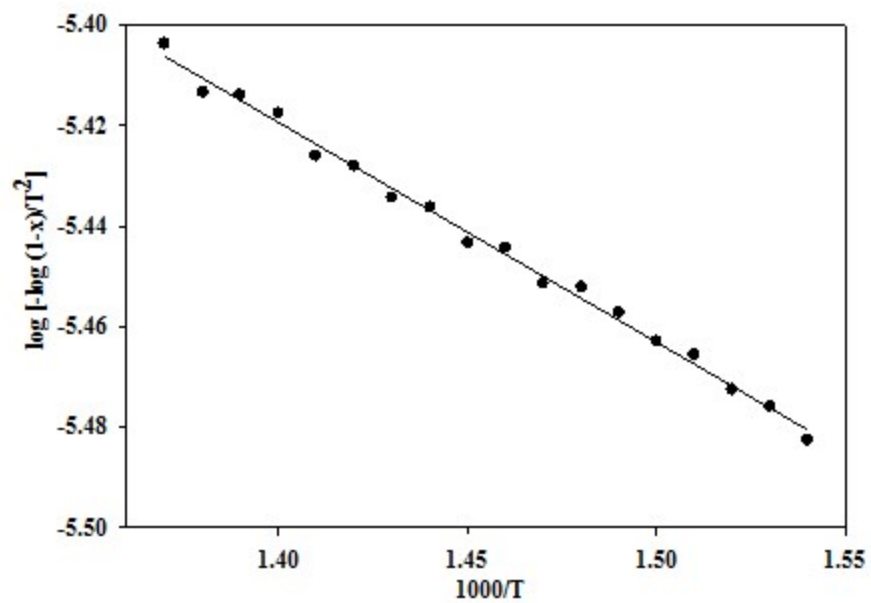

**Fig. S6** A plot of  $\log (-\log (1-x)/T^2)$  vs.  $1000/T$  of copper complex based on Coats-Redfern equation

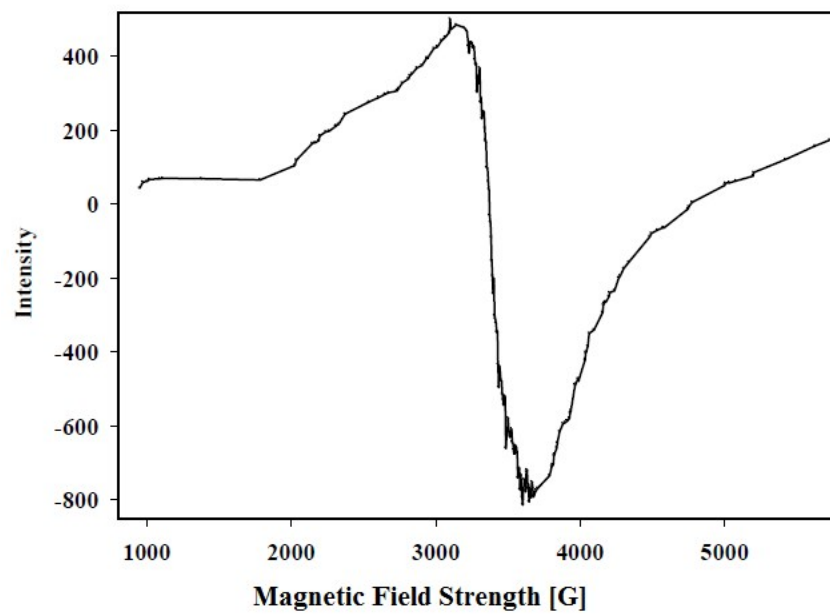

**Fig. S7** The ESR spectrum of Cu-Sbat complex

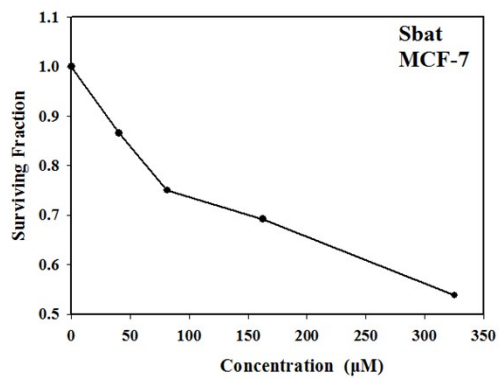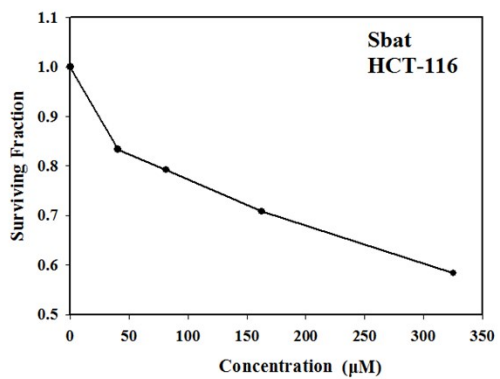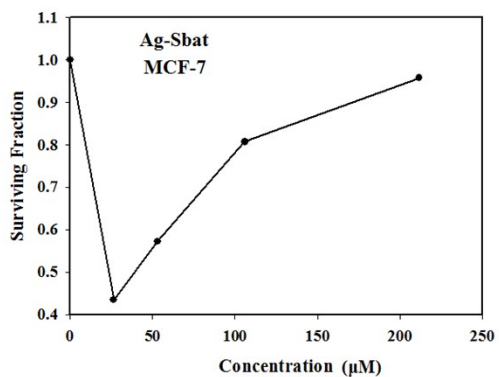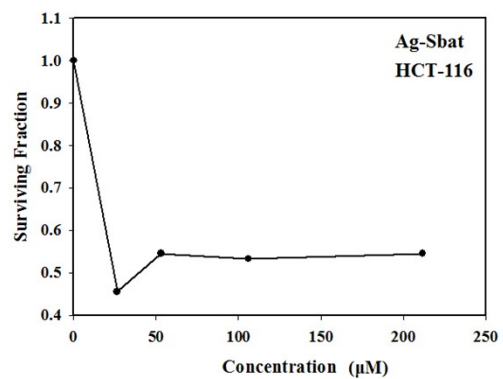

**Fig. S8 The  $IC_{50}$  values of the studied Sbat Schiff base and its complex Ag-Sbat against MCF-7 and HCT-116 cell lines**



**Table S1 Natural population of the total electrons in the complexes on the sub-shells using B3LYP/LANL2DZ**

|                       | Ag-Sbat                        | Cu-Sbat                        |
|-----------------------|--------------------------------|--------------------------------|
| Effective Core        | 28.00000                       | 10.00000                       |
| Core                  | 57.97789<br>(99.9619% of 58)   | 55.97833<br>(99.9613% of 56)   |
| Valence               | 139.50109<br>(99.6436% of 140) | 138.53080<br>(99.6624% of 139) |
| Natural Minimal Basis | 225.47899<br>(99.7695% of 226) | 204.50912<br>(99.7605% of 205) |
| Natural Rydberg Basis | 0.52101<br>(0.2305% of 226)    | 0.49088<br>(0.2395% of 205)    |

**Table S2 Total static dipole moment ( $\mu$ ), the mean polarizability  $\langle\alpha\rangle$ , the anisotropy of the polarizability  $\Delta\alpha$  and the first order hyperpolarizability  $\langle\beta\rangle$  for the complexes using B3LYP/LANL2DZ**

| Property                     | Urea                    | Sbat                    | Ag-Sbat                 | Cu-Sbat                 |
|------------------------------|-------------------------|-------------------------|-------------------------|-------------------------|
| $x\mu$                       |                         | -1.8302                 | 0.8845                  | 2.8811                  |
| $y\mu$                       |                         | 2.0683                  | 6.5057                  | 0.0263                  |
| $z\mu$                       |                         | 0.5491                  | 1.0940                  | 0.6637                  |
| $\mu$ (,D)                   | 1.3197                  | 2.8159                  | 6.6551                  | 2.9567                  |
| $\alpha_{xx}$ , au           |                         | -66.5128                | -144.2016               | -116.7465               |
| $\alpha_{yy}$                |                         | -140.6692               | -163.4716               | -149.2615               |
| $\alpha_{zz}$                |                         | -123.2214               | -161.2235               | -155.8040               |
| $\alpha_{xy}$                |                         | 21.4380                 | -64.1960                | 41.3467                 |
| $\alpha_{xz}$                |                         | -0.0708                 | 2.9646                  | 3.7723                  |
| $\alpha_{yz}$                |                         | -1.8738                 | -0.6322                 | 5.1133                  |
| $\langle\alpha\rangle$ , esu |                         | $-1.632\times 10^{-23}$ | $-2.316\times 10^{-23}$ | $-2.084\times 10^{-23}$ |
| $\Delta\alpha$ , esu         |                         | $9.952\times 10^{-24}$  | $2.705\times 10^{-24}$  | $5.370\times 10^{-24}$  |
| $\beta_{xxx}$ , au.          |                         | -236.4058               | -159.5028               | 157.1280                |
| $\beta_{yyy}$                |                         | 47.9714                 | 159.2092                | -72.7442                |
| $\beta_{zzz}$                |                         | 0.2297                  | -34.0541                | -28.8688                |
| $\beta_{xyy}$                |                         | -20.1473                | -92.0317                | 146.0700                |
| $\beta_{xxy}$                |                         | -6.0145                 | 44.0277                 | 32.9440                 |
| $\beta_{xxz}$                |                         | -6.4757                 | -6.9564                 | 33.2657                 |
| $\beta_{xzz}$                |                         | -4.9762                 | -46.5174                | 28.2583                 |
| $\beta_{yzz}$                |                         | -7.1374                 | -5.1148                 | -11.3472                |
| $\beta_{yyz}$                |                         | 1.7659                  | 7.2477                  | -10.9779                |
| $\beta_{xyz}$                |                         | -0.0682                 | 43.9141                 | 26.2119                 |
| $\langle\beta\rangle$ , esu  | $0.1947\times 10^{-30}$ | $2.280\times 10^{-30}$  | $3.106\times 10^{-30}$  | $2.898\times 10^{-30}$  |

**Table S3 Orbital involved in vertical transition, coefficient, oscillator strength, transition energy, observed and calculated wavelength for Ag-Sbat and Cu-Sbat**

| State   | Orbital  | Coefficient<br>t | f     | $\Delta E$ , eV | $\lambda_{\max}$ |       |
|---------|----------|------------------|-------|-----------------|------------------|-------|
|         |          |                  |       |                 | Exp.             | Calc. |
| Ag-Sbat |          |                  |       |                 |                  |       |
| S1      | 96-100   | 0.1405           | 0.046 | 3.9             | 320              | 326   |
|         | 97-100   | 0.1551           |       |                 |                  |       |
|         | 98-100   | 0.6192           |       |                 |                  |       |
|         | 98-101   | 0.1485           |       |                 |                  |       |
|         | 98-102   | 0.1139           |       |                 |                  |       |
|         | 94-101   | 0.1007           |       |                 |                  |       |
| S2      | 97-100   | 0.2507           | 0.483 | 4.90            | 290              | 289   |
|         | 98-102   | 0.1152           |       |                 |                  |       |
|         | 99-100   | 0.2025           |       |                 |                  |       |
|         | 98-101   | 0.6001           |       |                 |                  |       |
| Cu-Sbat |          |                  |       |                 |                  |       |
| S1      | 91A-99A  | 0.1062           | 0.015 | 3.9             | 327              | 335   |
|         | 93A-99A  | 0.1384           |       |                 |                  |       |
|         | 96A-99A  | 0.1948           |       |                 |                  |       |
|         | 97A-99A  | 0.4883           |       |                 |                  |       |
|         | 98A-100A | 0.3602           |       |                 |                  |       |
|         | 89B-98B  | 0.1219           |       |                 |                  |       |
|         | 96B-99B  | 0.4668           |       |                 |                  |       |
|         | 96B-100B | 0.1876           |       |                 |                  |       |
|         | 97B-100B | 0.3762           |       |                 |                  |       |
| S2      | 93A-100A | 0.662            | 0.433 | 4.13            | 298              | 300   |
|         | 94A-99A  | 0.1141           |       |                 |                  |       |
|         | 96A-99A  | 0.2710           |       |                 |                  |       |
|         | 97A-100A | 0.1167           |       |                 |                  |       |
|         | 98A-102A | 0.1942           |       |                 |                  |       |
|         | 87B-98B  | 0.1592           |       |                 |                  |       |
|         | 88B-98B  | 0.2910           |       |                 |                  |       |
|         | 92B-100B | 0.1021           |       |                 |                  |       |
|         | 93B-100B | 0.1391           |       |                 |                  |       |
|         | 94B-99B  | 0.4617           |       |                 |                  |       |
|         | 95B-99B  | 0.5221           |       |                 |                  |       |
|         | 96B-100B | 0.1752           |       |                 |                  |       |
|         | 97B-102B | 0.1582           |       |                 |                  |       |
