# Supplementary figures and images for: A coumarin Schiff base and its Ag(i) and Cu(ii) complexes: synthesis, characterization, DFT calculations and biological applications
Source: Royal Society of Chemistry journal article supplement (doi:10.1039/d0nj05688j), 2021-01-01

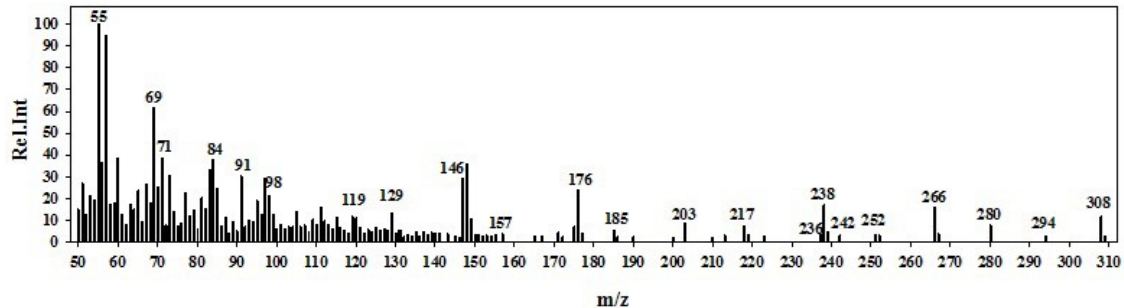

Supplement: d0nj05688j2.pdf [file d0nj05688j2.pdf]

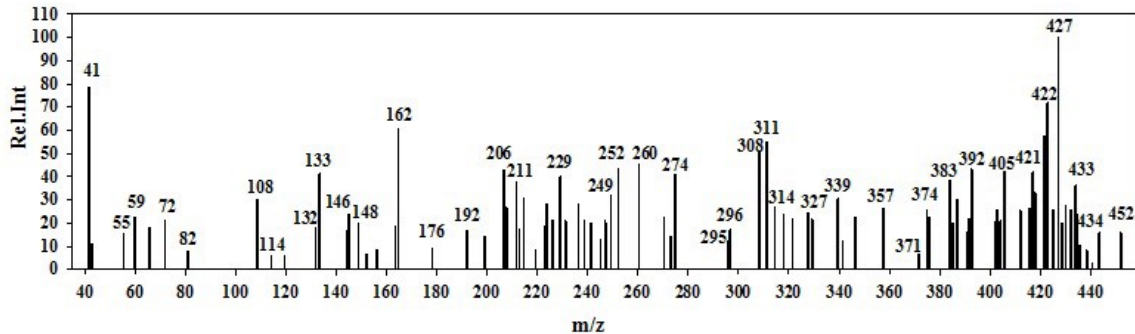

Supplement: d0nj05688j3.pdf [file d0nj05688j3.pdf]

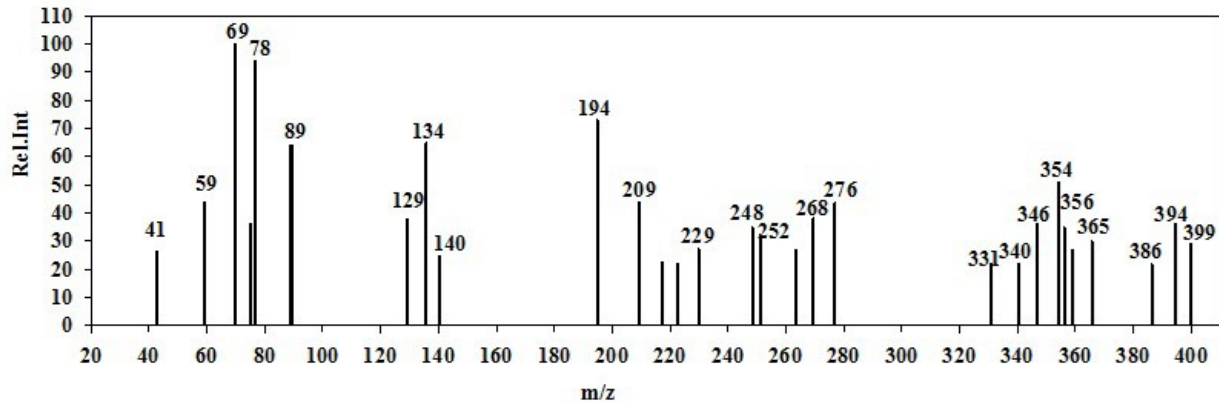

Supplement: d0nj05688j4.pdf [file d0nj05688j4.pdf]

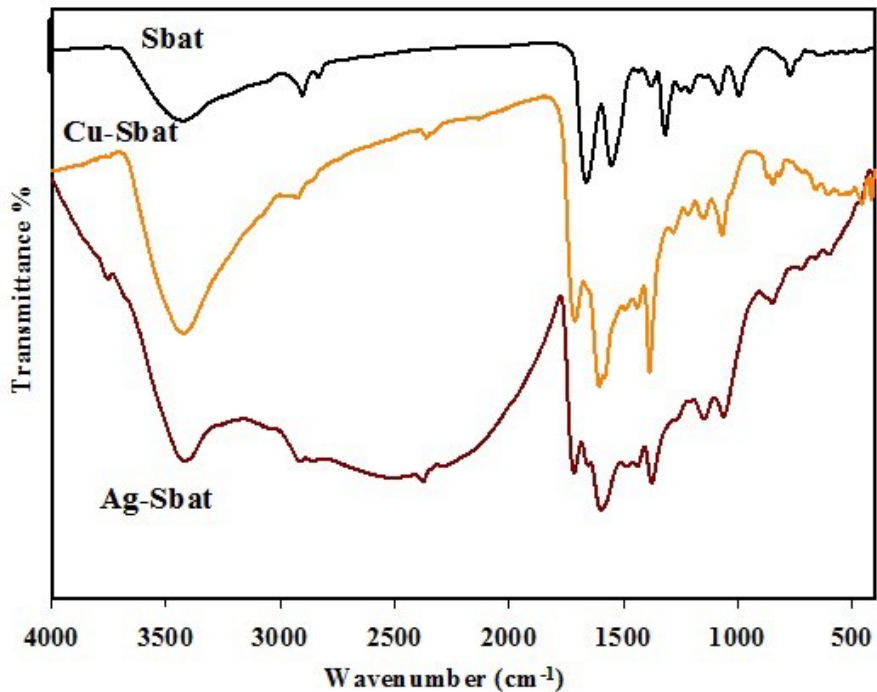

Supplement: d0nj05688j5.pdf [file d0nj05688j5.pdf]

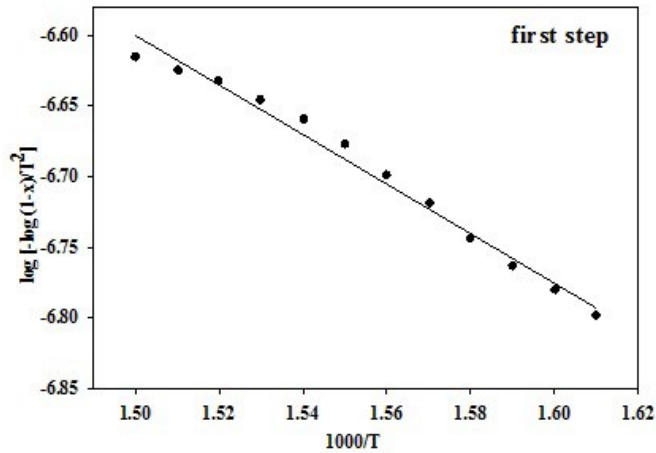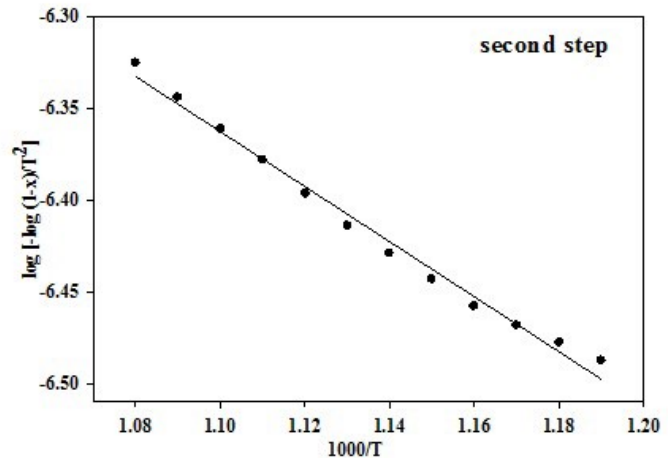

Supplement: d0nj05688j6.pdf [file d0nj05688j6.pdf]

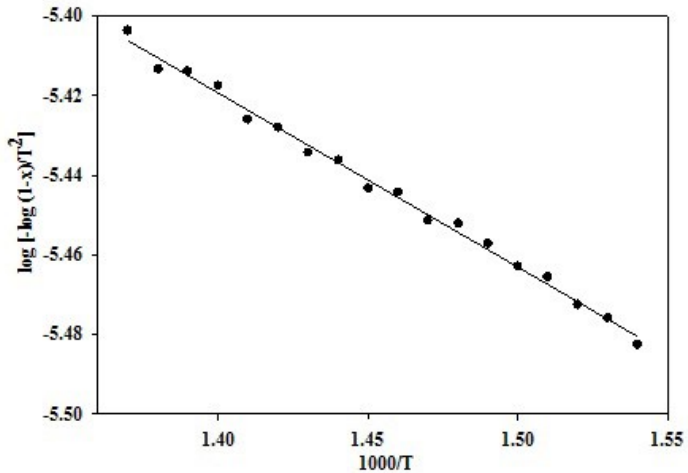

Supplement: d0nj05688j7.pdf [file d0nj05688j7.pdf]

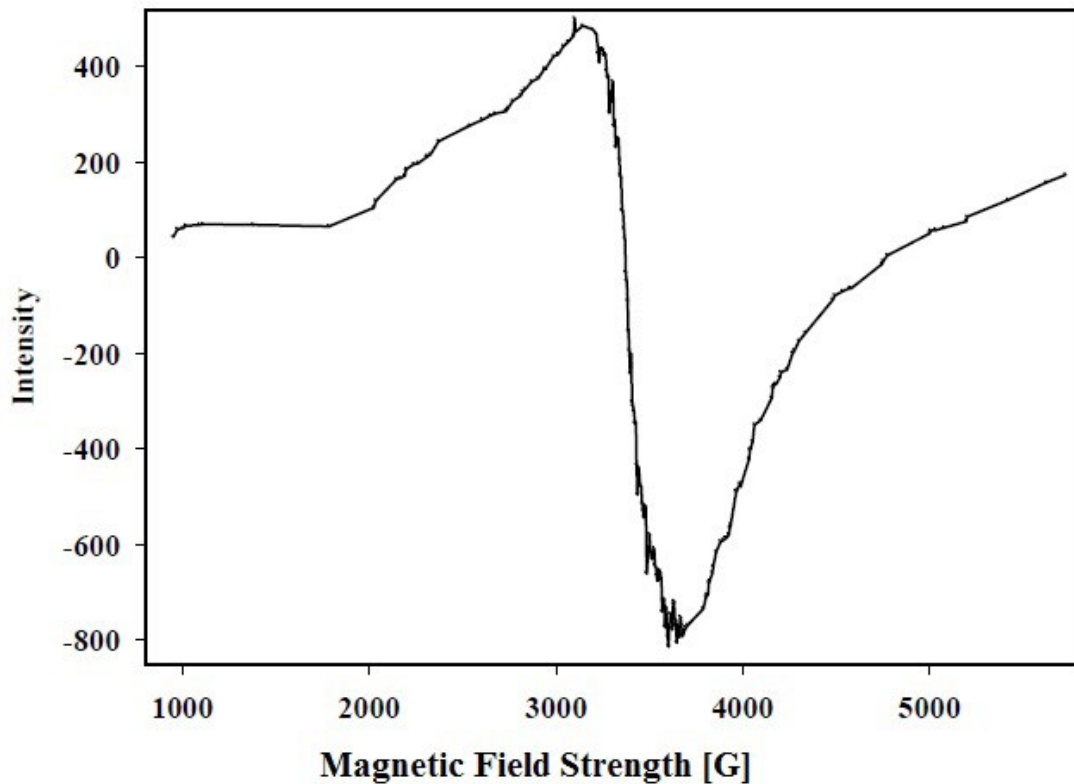

Supplement: d0nj05688j8.pdf [file d0nj05688j8.pdf]

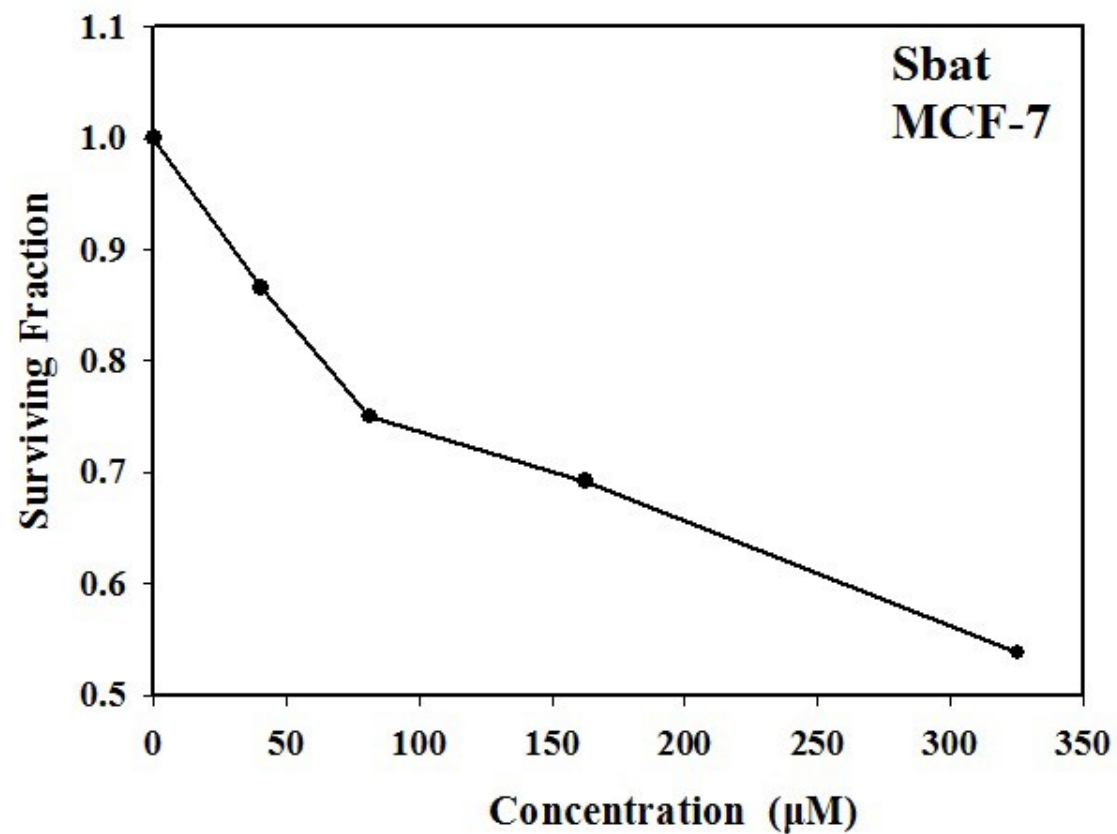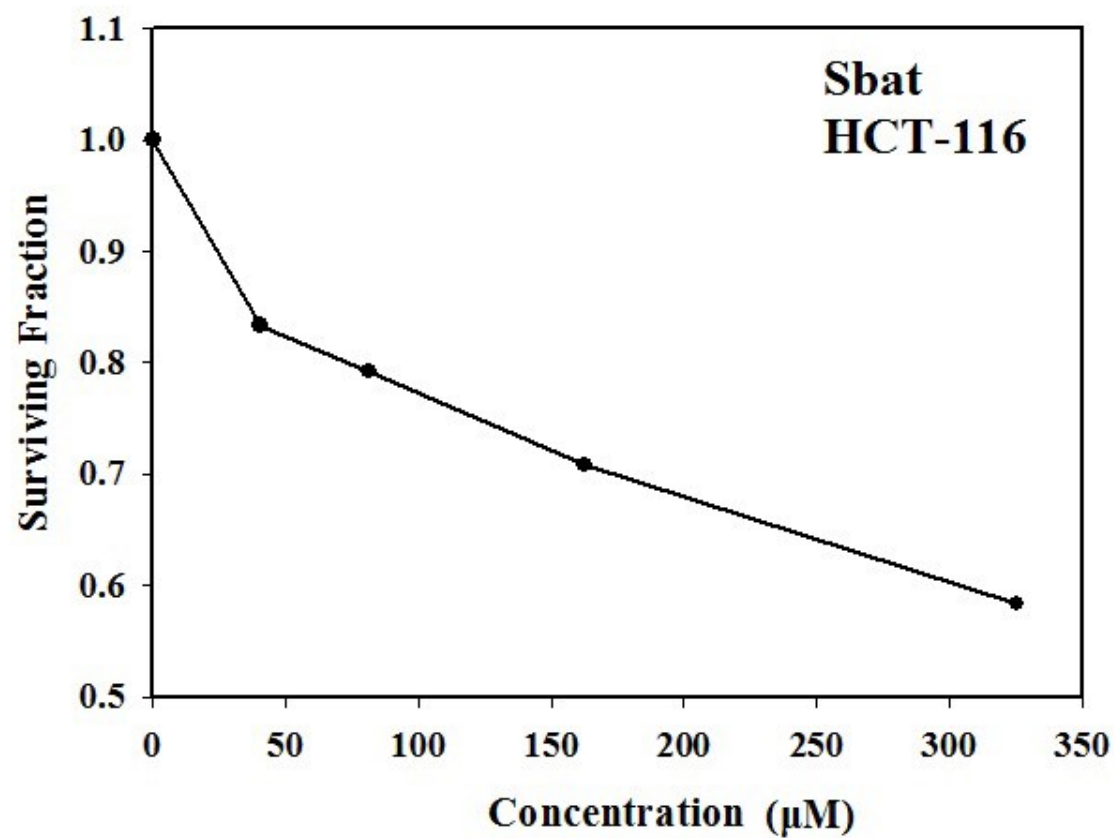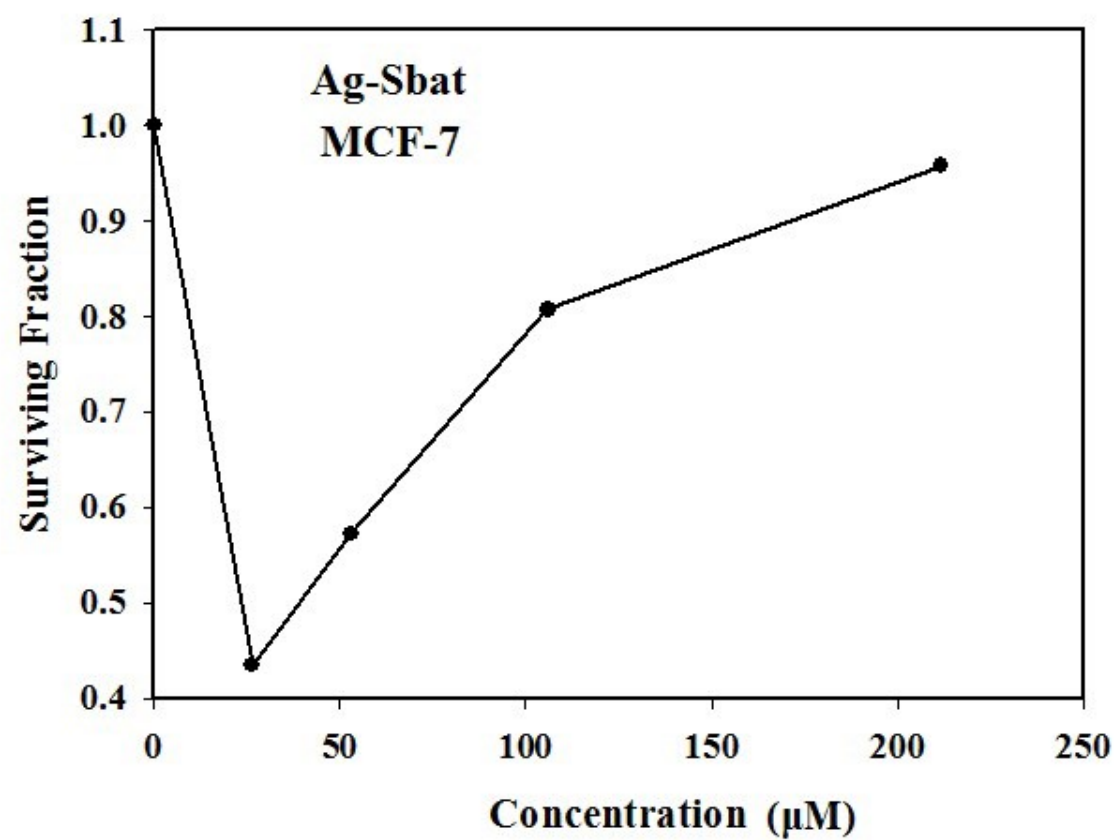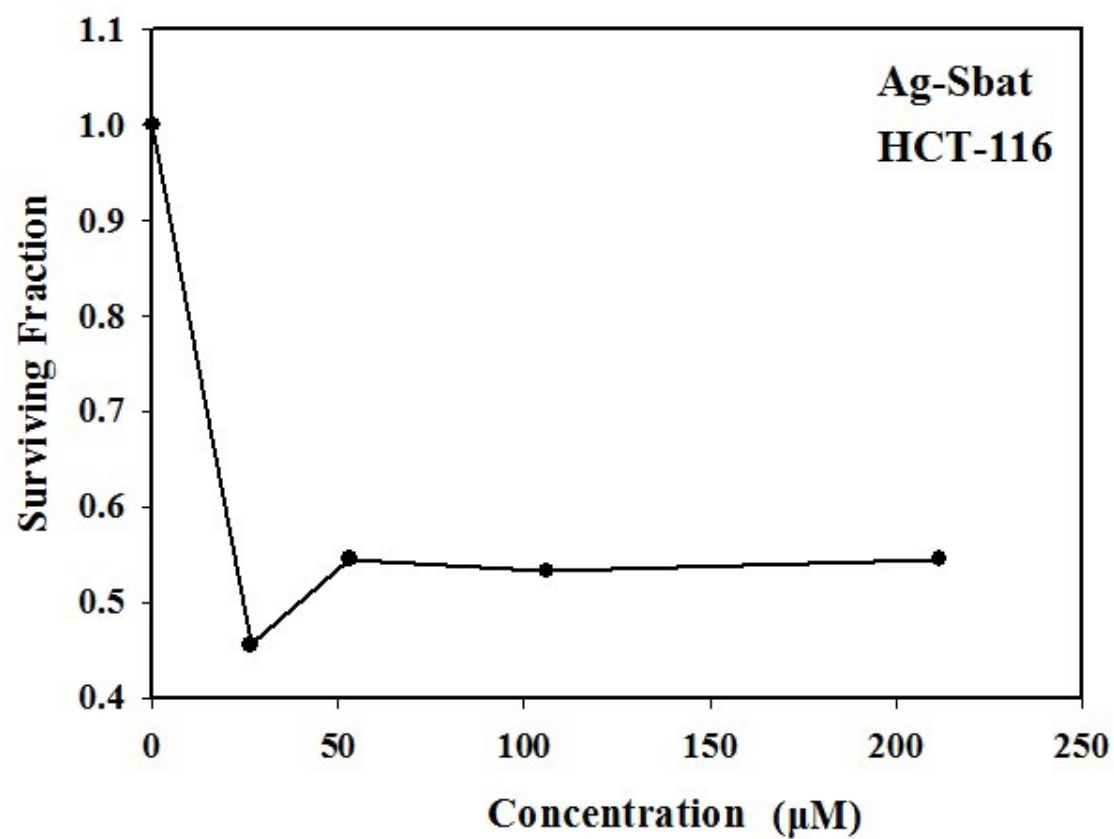

Supplement: d0nj05688j9.pdf [file d0nj05688j9.pdf]
